# Supplementary material
Source: publisher figshare collection journal article supplement (https://tandf.figshare.com/articles/dataset/_/8015786)

## Tumor necrosis correlates with PD-L1 and PD-1 expression in lung adenocarcinoma

Lilla Reiniger, Vanda Téglási, Orsolya Pipek, Livia Rojkó, Tibor Glasz, Attila Vágvolgyi, Ilona Kovalszky, Márton Gyulai, Zoltán Lohinai, Erzsébet Rásó, József Tímár, Balázs Döme, Zoltán Szállási, Judit Moldvay

**Supplementary figure 1. Exemplary images of tumor necrosis.** Tumor necrosis was defined as present if any amount of necrotic tissue was visible in the tumor mass. Necrotic tumor tissue was specified as an area showing increased eosinophilia without tumor cell nuclei or with nuclear shrinkage or fragmentation.

**A:** Extensive tumor necrosis. **B:** Small focus of necrosis. **C:** No necrosis is present.

(H&E stain, 100x magnification, scale bars represent 100 $\mu$ m)

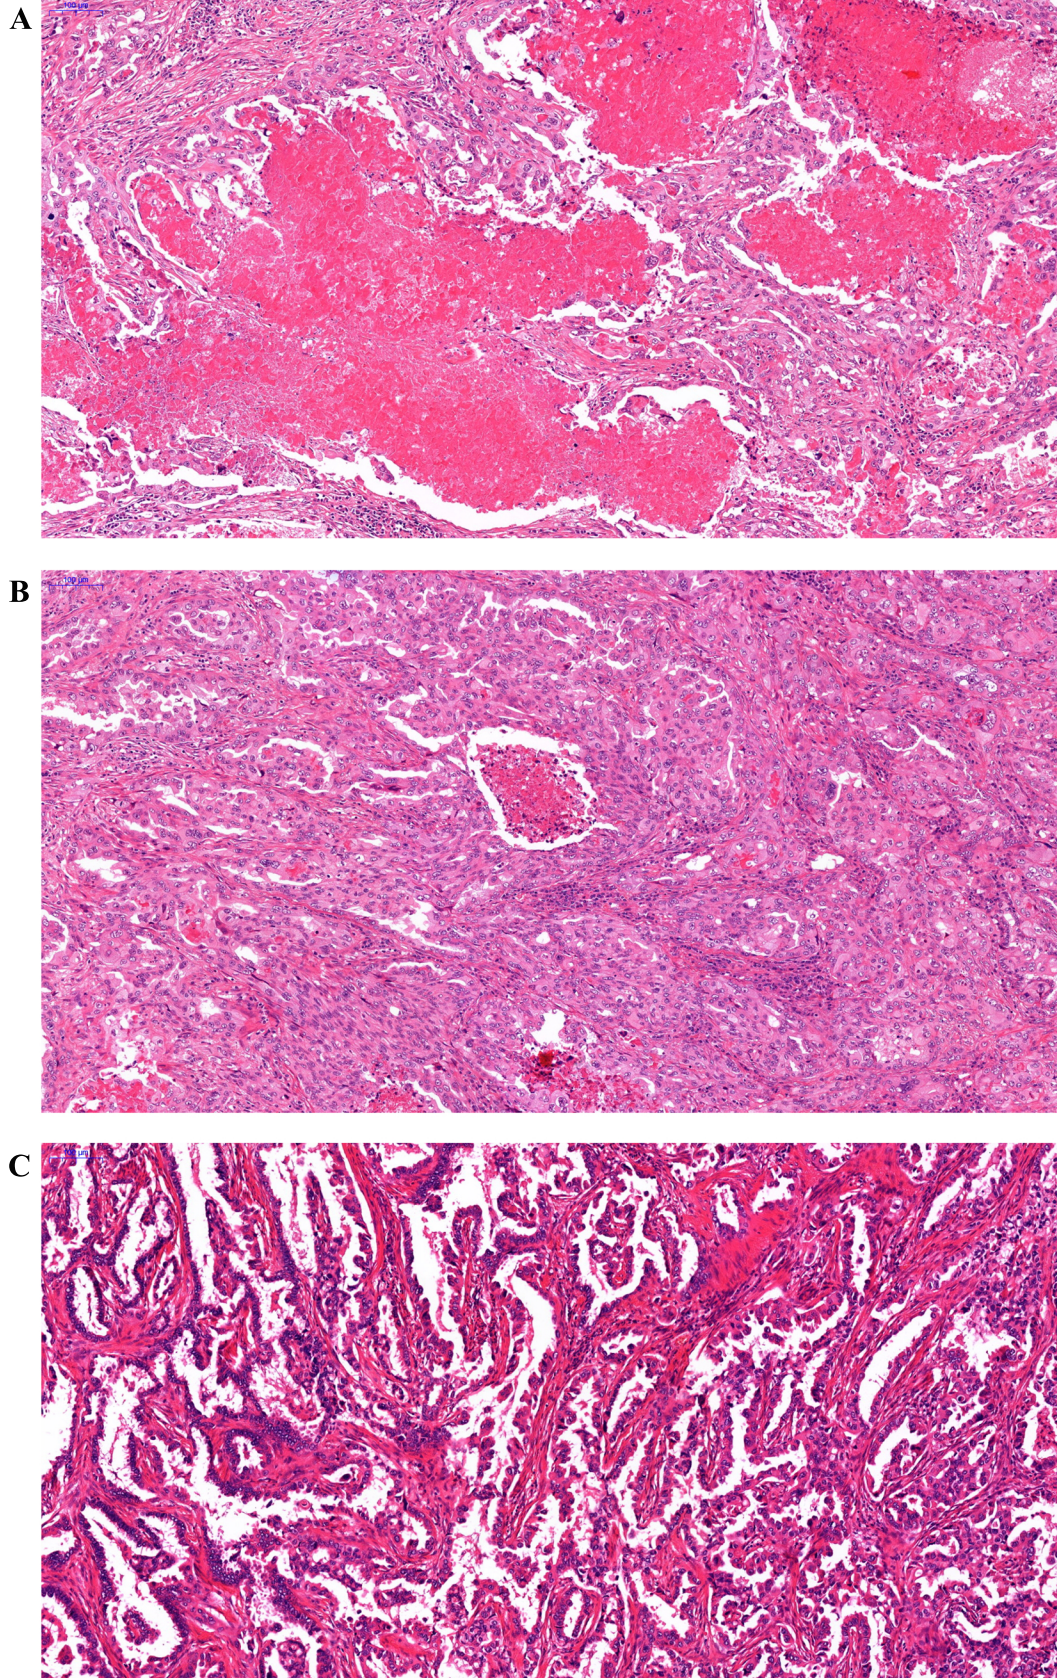

Supplement: Supplementary file 2 [file 1]
